# Supplementary material for: Zivildienstleistende als „helfende Hände“ im Privathaushalt
Source: Atypon-hosted journal article supplement (doi:10.1024/1012-5302/a000828), 2021-10-21
Supplement: 1012-5302_a000828_esm1.pdf [file 1012-5302_a000828_esm1.pdf]

# Schweizweite Umfrage: Zivildienstleistende zur Unterstützung von Angehörigen betreuungsbedürftiger Personen

Fragebogenversion für betreuende Angehörige

**Interne Anmerkung: Diese Umfrage wird nur online via Unipark-Tool geführt. Das Layout dort unterscheidet sich vom hier ersichtlichen.**

### **Herzlich willkommen zur Umfrage!**

**Vielen Dank**, dass Sie sich Zeit nehmen! Sie leisten damit einen wichtigen Beitrag, um die Bedürfnisse von Menschen besser zu verstehen, die jemanden aus dem Familien- oder Bekanntenkreis unterstützen. Die Umfrage dauert **etwa 15-25 Minuten**.

*(Falls Sie im Herbst 2018 bereits bei der Umfrage zu den Bedürfnissen pflegender Angehöriger des Bundesamtes für Gesundheit (BAG) mitgemacht haben: Einige Fragen werden Ihnen bekannt vorkommen. Aufgrund Ihrer Anonymität ist es notwendig, dass Sie gewisse Fragen erneut beantworten. Wir danken Ihnen für Ihre geschätzte Teilnahme.)*

- Anonymität ist gewährleistet: Ihre Antworten werden von *[für Review anonymisierte Institution]* ausgewertet. Wir können Ihren Namen und Ihre Adresse nicht zurückverfolgen.
- Es gibt keine richtigen oder falschen Antworten. Kreuzen Sie bitte das an, was für Sie stimmt.
- Vielleicht passt keine Antwort ganz genau. Dann kreuzen Sie bitte die Antwort an, die am ehesten passt.

**Interne Anmerkung: Bei jeder Frage soll es die Möglichkeit geben, sich einer Antwort zu enthalten, ausser bei den Einstiegsfragen (u.a. wegen Ausschlusskriterien) und den Referenzfragen für die Beispiele des Teils 4. Die Enthaltung soll aber erst möglich sein, nachdem man ein entsprechendes Feld anklickt mit dem Titel „keine Antwort“ und erst dann via „Weiter“ zur nächsten Frage gelangt. Es soll also nicht möglich zu sein, ohne eine Markierung zu setzen direkt „Weiter“ zu klicken.**

## Einstiegsfragen

**Interne Anmerkung: Bei den Einstiegsfragen gibt es nicht die Möglichkeit, mit dem Fragebogen weiterzufahren, ohne zu antworten.**

**1. Wie viele Personen aus dem Familien- oder Bekanntenkreis unterstützen Sie im Alltag? Sie helfen z.B. im Haushalt, begleiten in die Arztpraxis oder helfen bei der Körperpflege. Nicht gemeint ist das Kinderhüten, Freiwilligenarbeit für eine Organisation sowie finanzielle Unterstützung.**

Ich unterstütze **niemanden in diesem Sinn**

Ich unterstütze  **Person(en)**

**Interne Anmerkung: Falls die/der Befragte niemanden unterstützt ist die Umfrage hier zu Ende mit dem folgenden Hinweis.**

Da Sie niemanden in diesem Sinn unterstützen, ist die Umfrage für Sie hier zu Ende. **Vielen Dank!**

**Interne Anmerkung: Falls mehr als eine Person unterstützt wird, folgt der Hinweis:**

**Wichtig:** Denken Sie bei den folgenden Antworten nur an die Person, die am meisten Unterstützung von Ihnen bekommt. Diese Person nennen wir ab hier „**die unterstützte Person**“.

## 2. Wie wohnt die unterstützte Person normalerweise?

**Interne Anmerkung: Eine aus den 6 Antworten ist zu wählen, keine Mehrfachnennungen möglich.**

- allein in einem Privathaushalt**
- mit mir zusammen in einem Privathaushalt** (und evtl. mit weiteren Personen)
- mit anderen Personen in einem Privathaushalt, aber nicht mit mir**
- Pflegewohnung oder Servicewohnen**
- Pflegeheim, Altersheim oder Behindertenwohnheim**
- andere pflegeorientierte Wohnform:**

**Interne Anmerkung: Falls die unterstützte Person in einem Pflege-, Alters- oder Behindertenwohnheim lebt ist die Umfrage hier zu Ende mit dem folgenden Hinweis.**

Da die von Ihnen unterstützte Person in einem Pflegeheim, Altersheim oder Behindertenwohnheim wohnt, ist die Umfrage für Sie hier zu Ende. **Vielen Dank!**

## Teil 1: Die unterstützte Person

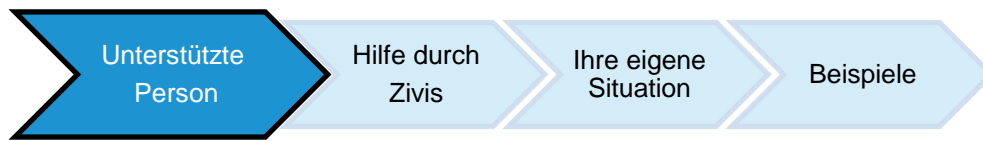

### 3. Welches Geschlecht hat die unterstützte Person?

- Frau  Mann  non-binär/trans.

### 4. Wie alt ist die unterstützte Person?

Jahre

### 5. Warum braucht diese Person Unterstützung?

(Mehrere Antworten möglich)

- körperliche Einschränkungen**, z.B. wegen Alter, Unfall, Krankheit oder körperlicher Behinderung
- psychische Schwierigkeiten**, z.B. wegen Ängsten, Depression, Sucht oder Zwängen
- geistige Einschränkungen**, z.B. wegen Demenz, Lernstörung, Verletzung am Kopf
- andere Gründe:**

**6. Wie oft wird die Person insgesamt unterstützt...**

- ...von Ihnen
- ...von anderen Angehörigen und Bekannten
- ...und Freiwilligen

**Nicht gemeint: Spitex, andere professionelle Organisationen, finanzielle Unterstützung. Bitte wählen Sie, was am ehesten passt.**

- jeden Tag rund um die Uhr
- 5-7 Tage die Woche tagsüber (etwa 8 Std.)
- 5-7 Tage die Woche halbtags (etwa 4 Std.)
- 1-4 Tage die Woche
- seltener oder nicht regelmässig

## Teil 2: Hilfe durch Zivildienstleistende

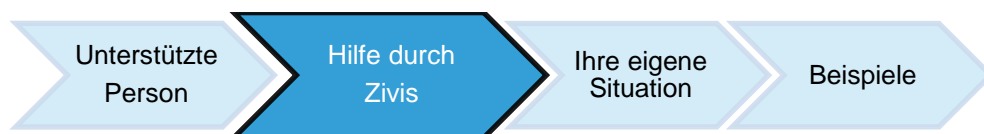

Im Folgenden interessiert uns Ihre Meinung dazu, Zivildienstleistende für die Unterstützung bei der Betreuung von Menschen zu Hause einzusetzen. Zu Ihrer Information:

- Zivildienstleistende – umgangssprachlich „Zivis“ – **ersetzen nicht** die Betreuung/Pflege durch **professionelle Dienste wie z.B. die Spitex**. Sie sind als „**zusätzliche, helfende Hände**“ im Einsatz.
- Zivis sind Männer, meistens im Alter zwischen 19 und 30 Jahren, mit verschiedenen Berufen.
- Bei Zivis wird der Leumund geprüft. Z.B. wird bei Fahraufträgen sichergestellt, dass sie nicht wegen Verkehrsdelikten verurteilt wurden.
- Zivis durchlaufen je nach Länge des Einsatzes verschiedene Kurse:

### Dauer und Art der Ausbildung

Ist der Einsatz kürzer als 8 Wochen, wird keine Ausbildung benötigt. Bei Einsätzen ab 8 Wochen gilt:

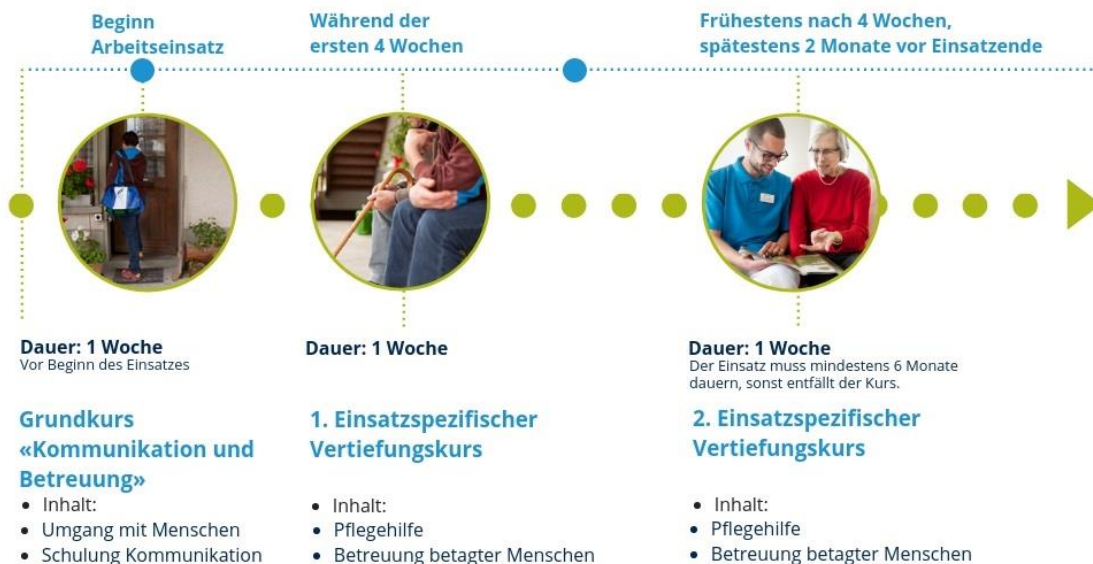

(Mehr Informationen: <https://www.zivi.admin.ch/zivi/de/home/zivi-sein/ausbildungskurse.html>)

**7. Wie sinnvoll fänden Sie es, dass Zivis Menschen mit Krankheit, mit Behinderung, nach einem Unfall oder im hohen Alter zu Hause unterstützen?**

- sehr sinnvoll
- eher sinnvoll
- unentschieden
- eher nicht sinnvoll
- überhaupt nicht sinnvoll

**8. Sind weitere Kurse/Vorkenntnisse nötig oder gibt es sonstige Bedingungen, die der Zivi erfüllen sollte?**

- nein
- ja, Folgendes:

**9. Wie oft wird die Person insgesamt unterstützt...**

- ...von Ihnen
- ...von anderen Angehörigen und Bekannten
- ...und Freiwilligen

**...in den folgenden Bereichen?**

**Nicht gemeint: Spitex, andere professionelle Organisationen, finanzielle Unterstützung**

**Interne Anmerkung: Diese sind Referenzfragen für die Beispiele in Teil 4. Es gibt also keine Möglichkeit, nicht zu antworten.**

**Haushalt:** (Beispiele: Einkaufen, Kochen, Abfall entsorgen, Putzen, Wäsche waschen, Gartenarbeit)



| Wie oft bekommt die Person Unterstützung?                                                                                                                                | Könnte hier ein Zivi helfen?                                                                                                                                                                       |
|--------------------------------------------------------------------------------------------------------------------------------------------------------------------------|----------------------------------------------------------------------------------------------------------------------------------------------------------------------------------------------------|
| <input type="radio"/> jeden Tag<br><input type="radio"/> an einigen Tagen pro Woche<br><input type="radio"/> einmal pro Woche oder seltener<br><input type="radio"/> nie | <input type="radio"/> ja, auf jeden Fall<br><input type="radio"/> eher ja<br><input type="radio"/> unentschieden<br><input type="radio"/> eher nein<br><input type="radio"/> nein, auf keinen Fall |

**Fahrdienst:** (Für Sie oder die unterstützte Person. Beispiele: Zur unterstützten Person, zu einem Amt, in die Therapie, zum Einkaufen, zu Bekannten, zu einer Freizeitaktivität)

| Wie oft bekommt die Person Unterstützung?                                                                                                                                | Könnte hier ein Zivi helfen?                                                                                                                                                                       |
|--------------------------------------------------------------------------------------------------------------------------------------------------------------------------|----------------------------------------------------------------------------------------------------------------------------------------------------------------------------------------------------|
| <input type="radio"/> jeden Tag<br><input type="radio"/> an einigen Tagen pro Woche<br><input type="radio"/> einmal pro Woche oder seltener<br><input type="radio"/> nie | <input type="radio"/> ja, auf jeden Fall<br><input type="radio"/> eher ja<br><input type="radio"/> unentschieden<br><input type="radio"/> eher nein<br><input type="radio"/> nein, auf keinen Fall |

**Administratives, Finanzielles regeln:** (Beispiele: Formulare ausfüllen, Anträge für finanzielle Hilfe, Abklären von Sozialversicherungen)

| Wie oft bekommt die Person Unterstützung?                                                                                                                                | Könnte hier ein Zivi helfen?                                                                                                                                                                       |
|--------------------------------------------------------------------------------------------------------------------------------------------------------------------------|----------------------------------------------------------------------------------------------------------------------------------------------------------------------------------------------------|
| <input type="radio"/> jeden Tag<br><input type="radio"/> an einigen Tagen pro Woche<br><input type="radio"/> einmal pro Woche oder seltener<br><input type="radio"/> nie | <input type="radio"/> ja, auf jeden Fall<br><input type="radio"/> eher ja<br><input type="radio"/> unentschieden<br><input type="radio"/> eher nein<br><input type="radio"/> nein, auf keinen Fall |

**Koordinieren, Planen:** (Beispiele: Termine abmachen, mit Hausarztpraxis oder der Spitex reden, eine Therapie suchen, Hilfsmittel organisieren und unterhalten)

| Wie oft bekommt die Person Unterstützung?                                                                                                                                | Könnte hier ein Zivi helfen?                                                                                                                                                                       |
|--------------------------------------------------------------------------------------------------------------------------------------------------------------------------|----------------------------------------------------------------------------------------------------------------------------------------------------------------------------------------------------|
| <input type="radio"/> jeden Tag<br><input type="radio"/> an einigen Tagen pro Woche<br><input type="radio"/> einmal pro Woche oder seltener<br><input type="radio"/> nie | <input type="radio"/> ja, auf jeden Fall<br><input type="radio"/> eher ja<br><input type="radio"/> unentschieden<br><input type="radio"/> eher nein<br><input type="radio"/> nein, auf keinen Fall |

**Soziale Begleitung:** (Beispiele: Spazieren, Vorlesen, E-mails schreiben, Trösten, Angst nehmen)

| Wie oft bekommt die Person Unterstützung?                                                                                                                                | Könnte hier ein Zivi helfen?                                                                                                                                                                       |
|--------------------------------------------------------------------------------------------------------------------------------------------------------------------------|----------------------------------------------------------------------------------------------------------------------------------------------------------------------------------------------------|
| <input type="radio"/> jeden Tag<br><input type="radio"/> an einigen Tagen pro Woche<br><input type="radio"/> einmal pro Woche oder seltener<br><input type="radio"/> nie | <input type="radio"/> ja, auf jeden Fall<br><input type="radio"/> eher ja<br><input type="radio"/> unentschieden<br><input type="radio"/> eher nein<br><input type="radio"/> nein, auf keinen Fall |

**Bewegen:** (Beispiele: Aufstehen, Hinsetzen, Spazieren mit Gehhilfen, z.B. Rollstuhl oder Rollator)

| Wie oft bekommt die Person Unterstützung?                                                                                                                                                                       | Könnte hier ein Zivi helfen?                                                                                                                        |
|-----------------------------------------------------------------------------------------------------------------------------------------------------------------------------------------------------------------|-----------------------------------------------------------------------------------------------------------------------------------------------------|
| <input type="radio"/> jeden Tag, jedes Mal<br><input type="radio"/> jeden Tag, aber nicht jedes Mal<br><input type="radio"/> an einigen Tagen pro Woche<br><input type="radio"/> einmal pro Woche oder seltener | <input type="radio"/> ja, auf jeden Fall<br><input type="radio"/> eher ja<br><input type="radio"/> unentschieden<br><input type="radio"/> eher nein |

|                           |                                             |
|---------------------------|---------------------------------------------|
| <input type="radio"/> nie | <input type="radio"/> nein, auf keinen Fall |
|---------------------------|---------------------------------------------|

**Körperpflege:** (Beispiele: Baden, Duschen, Gang zur Toilette, Zähneputzen, Rasieren, An-/Ausziehen)

| Wie oft bekommt die Person Unterstützung?             | Könnte hier ein Zivi helfen?                |
|-------------------------------------------------------|---------------------------------------------|
| <input type="radio"/> jeden Tag, jedes Mal            | <input type="radio"/> ja, auf jeden Fall    |
| <input type="radio"/> jeden Tag, aber nicht jedes Mal | <input type="radio"/> eher ja               |
| <input type="radio"/> an einigen Tagen pro Woche      | <input type="radio"/> unentschieden         |
| <input type="radio"/> einmal pro Woche oder seltener  | <input type="radio"/> eher nein             |
| <input type="radio"/> nie                             | <input type="radio"/> nein, auf keinen Fall |

**Essen und Trinken:** (Beispiele: Essen oder Trinken reichen, Kontrolle der Trinkmenge, Motivieren zum Essen und Trinken)

| Wie oft bekommt die Person Unterstützung?             | Könnte hier ein Zivi helfen?                |
|-------------------------------------------------------|---------------------------------------------|
| <input type="radio"/> jeden Tag, jedes Mal            | <input type="radio"/> ja, auf jeden Fall    |
| <input type="radio"/> jeden Tag, aber nicht jedes Mal | <input type="radio"/> eher ja               |
| <input type="radio"/> an einigen Tagen pro Woche      | <input type="radio"/> unentschieden         |
| <input type="radio"/> einmal pro Woche oder seltener  | <input type="radio"/> eher nein             |
| <input type="radio"/> nie                             | <input type="radio"/> nein, auf keinen Fall |

**Sicherheit geben, Überwachen:** (Beispiele: Schauen, dass die unterstützte Person nicht wegläuft, nicht hinfällt, ob der Person etwas gereicht werden muss)

| Wie oft bekommt die Person Unterstützung?        | Könnte hier ein Zivi helfen?             |
|--------------------------------------------------|------------------------------------------|
| <input type="radio"/> jeden Tag, rund um die Uhr | <input type="radio"/> ja, auf jeden Fall |
| <input type="radio"/> jeden Tag, tagsüber        | <input type="radio"/> eher ja            |

- |                                                      |                                             |
|------------------------------------------------------|---------------------------------------------|
| <input type="radio"/> an einigen Tagen pro Woche     | <input type="radio"/> unentschieden         |
| <input type="radio"/> einmal pro Woche oder seltener | <input type="radio"/> eher nein             |
| <input type="radio"/> nie                            | <input type="radio"/> nein, auf keinen Fall |

**10. Finden Sie Unterstützung durch Zivis auch noch in anderen Bereichen wichtig?**

nein

ja, in folgenden Bereichen:

**Interne Anmerkung: Die folgenden Bulletpoints und die folgenden zwei Fragen werden optisch auf einer Seite angezeigt, damit der Befragte sie auf einen Blick sieht.**

**Auf dieser Seite stellen wir Ihnen Fragen zur Organisation von Zivi-Einsätzen. Bitte beachten Sie dabei:**

- Wochenend-, Abend- und Nachteinsätze von Zivis sind möglich.
- Der einzelne Zivi hat unterschiedlich lange Einsatzdauern.
- Ein zeitlich nahtloser Übergang vom einen zum nächsten Zivi kann **nicht** garantiert werden. Grund: Es kann kein grundsätzlicher Anspruch auf Zivi-Einsätze erhoben werden.

**11. Wieviel Unterstützung durch einen Zivi wäre für Sie am besten? Dazu gehört auch Sicherheit geben/Überwachen.**

**Interne Anmerkung: Diese ist eine Referenzfrage für die Beispiele in Teil 4. Es gibt also keine Möglichkeit, nicht zu antworten.**

- jeden Tag rund um die Uhr
- 5 Tage die Woche ganztags (8.4 Std.) mit Mittagspause
- 5 Tage die Woche halbtags (4 Std.)
- 1-4 Tage die Woche je 2-4 Std.
- Kurzfristige Einsätze je 1-4 Std., nicht regelmässig
- Keine

**12. Damit es für Sie überhaupt Sinn macht: Wie lange müsste der einzelne Zivi mindestens am Stück Einsatz leisten, bevor er durch einen neuen Zivi ersetzt wird?**

**Interne Anmerkung: Diese ist eine Referenzfrage für die Beispiele in Teil 4. Es gibt also keine Möglichkeit, nicht zu antworten.**

- keine Mindestdauer notwendig
- 1 Monat
- 3 Monate
- 6 Monate
- 1 Jahr

**Interne Anmerkung: Es folgt eine Frage zur Zahlungsbereitschaft, welche in drei Teilfragen unterteilt wird, wobei die jeweils nächste Teilfrage nur gestellt wird, wenn die vorherige mit „ja“ beantwortet wurde.**

**13. Wären Sie bereit, für einen Zivi-Einsatz 5 CHF pro Stunde zu bezahlen?**

- ja  
 nein

**Falls Ja:**

**14. Wären Sie bereit, für einen Zivi-Einsatz 15 CHF pro Stunde zu bezahlen?**

- ja  
 nein

**Falls Ja:**

**15. Wären Sie bereit, für einen Zivi-Einsatz 25 CHF pro Stunde zu bezahlen?**

- ja  
 nein

**16. Wie würden Sie Zivi-Einsätze gerne organisieren?**

(Mehrere Antworten möglich)

- telefonische** Einsatzvermittlung **mit fachlicher Beratung** durch eine Organisation (z.B. Rotes Kreuz, Pro Senectute, Spitex, Spital)
- telefonische** Einsatzvermittlung beim Bundesamt für Zivildienst **ohne fachliche Beratung**
- online** einen Zivi **auswählen** anhand seines Profils und seiner Verfügbarkeit auf einer Website
- selber online eine Anfrage aufschalten** mit gewünschter Einsatzzeit, auf die sich Zivis melden können
- anders, und zwar:**

**17. Was spricht aus Ihrer Sicht gegen den Einsatz von Zivis bei der unterstützten Person zu Hause?**

trifft gar nicht zu  
trifft eher nicht zu  
unentschieden  
trifft eher zu  
trifft sehr zu

| | | | |

Zivis sind **fachlich zu wenig ausgebildet** für die Unterstützungsaufgabe

Ich möchte nicht, dass ein fremder Mann **in der Wohnung/ im Haus** ist

Ich möchte nicht, dass ein fremder Mann **mit der unterstützten Person allein** ist

Ich möchte nicht, dass ein Mann die unterstützte **Person betreut**

Es gibt genug **andere Unterstützungsangebote**

Andere Gründe:

**18. Was ist Ihnen beim Einsatz von Zivis am wichtigsten?**

fachliche Qualifikation

angenehme Persönlichkeit

zeitliche Flexibilität

niedriger Preis

### Teil 3: Ihre eigene Situation

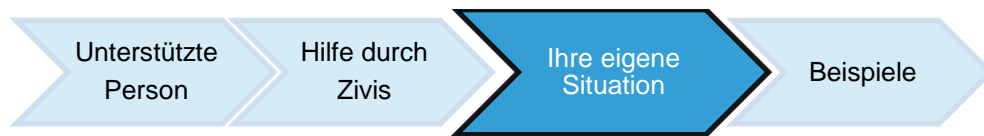

#### 19. An wie vielen Tagen pro Woche unterstützen Sie die Person?

Denken Sie bei der Antwort bitte an die letzten 3 Monate.

ca.  Tage pro Woche.

#### 20. Wie viele Stunden pro Woche unterstützen Sie die Person im Durchschnitt?

Denken Sie bei der Antwort bitte an die letzten 3 Monate.

ca.  Stunden pro Woche.

#### 21. Sind Sie erwerbstätig?

- ja  
 nein

Falls Ja:

#### 22. Wie viele Stellen-Prozente arbeiten Sie normalerweise?

- unter 20% (unter 8 Std. pro Woche)  
 20-49% (etwa 8 bis 20 Std. pro Woche)  
 50-79% (etwa 21 bis 33 Std. pro Woche)  
 80-100% (etwa 34 bis 42 Std. pro Woche)

#### 23. Welches ist Ihr Geschlecht?

- Frau    Mann    non-binär/trans.

#### 24. Wie alt sind Sie?

Jahre



## Teil 4: Beispiele

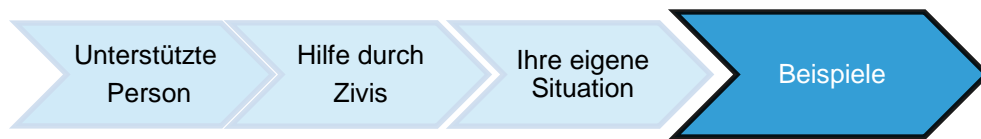

### Auf den nächsten Seiten zeigen wir Ihnen verschiedene Beispiele von Zivi-Einsätzen. Erklärung:

Bitte beurteilen Sie für jedes kommende Beispiel, wie zufrieden Sie damit wären und ob Sie einen Zivi so im Privathaushalt akzeptieren würden.

Z.B. gibt es zwei Typen von Tätigkeiten, bei denen der Zivi helfen könnte:

- **Ohne Körperkontakt:** Haushalt, Fahrdienst, Administratives, Finanzen, Koordinieren, Planen, soziale Begleitung, Überwachen und Sicherheit geben
- **Mit Körperkontakt:** Bewegen, Körperpflege, Essen und Trinken

#### Beispiel 1:

Der Zivi...

- hilft bei Tätigkeiten **mit und ohne Körperkontakt**
- ist **5 Tage pro Woche halbtags (4 Std.)** anwesend
- wechselt nach jeweils **1 Monat** (nahtloser Wechsel nicht garantiert)

#### Wie sehr wären Sie damit zufrieden?

Gar nicht zufrieden

Sehr zufrieden

0 1 2 3 4 5 6 7 8 9 10

#### Würden Sie diesen Zivi-Einsatz buchen, wenn er für Sie kostenlos wäre?

ja

nein

**Interne Anmerkung zu den abgefragten Beispielen:** Die in „*Beispiel 1*“ gezeigten Merkmale (siehe blauer Kasten) werden zu verschiedenen Beispielen kombiniert. Pro Teilnehmer werden maximal 8 solcher Beispiele abgefragt. Dabei werden die Beispiele für jeden Teilnehmer aus den für ihn/sie in Frage kommenden Merkmalen ausgewählt. Was in Frage kommt, hängt von den Antworten zu den Fragen weiter oben ab. (Beispielsweise kommt Betreuung rund um die Uhr durch einen Zivi nicht in Frage, wenn das angegebene Pensum nur tagsüber ist.)

**25. Wie schwierig fanden Sie die Beurteilung dieser Beispiele?**

- sehr schwierig
- eher schwierig
- eher einfach
- sehr einfach

## Herzlichen Dank fürs Mitmachen!

Haben Sie Anmerkungen oder Hinweise zu dieser Befragung?

Wenn Sie möchten, können Sie uns Ihre **e-mail oder Postadresse** im Feld unten aufschreiben, damit wir Sie in Zukunft für Umfragen kontaktieren dürfen. Die Anonymität Ihrer heutigen Antworten ist weiterhin gewährleistet. (Die Adresse wird getrennt von Ihren Antworten.)

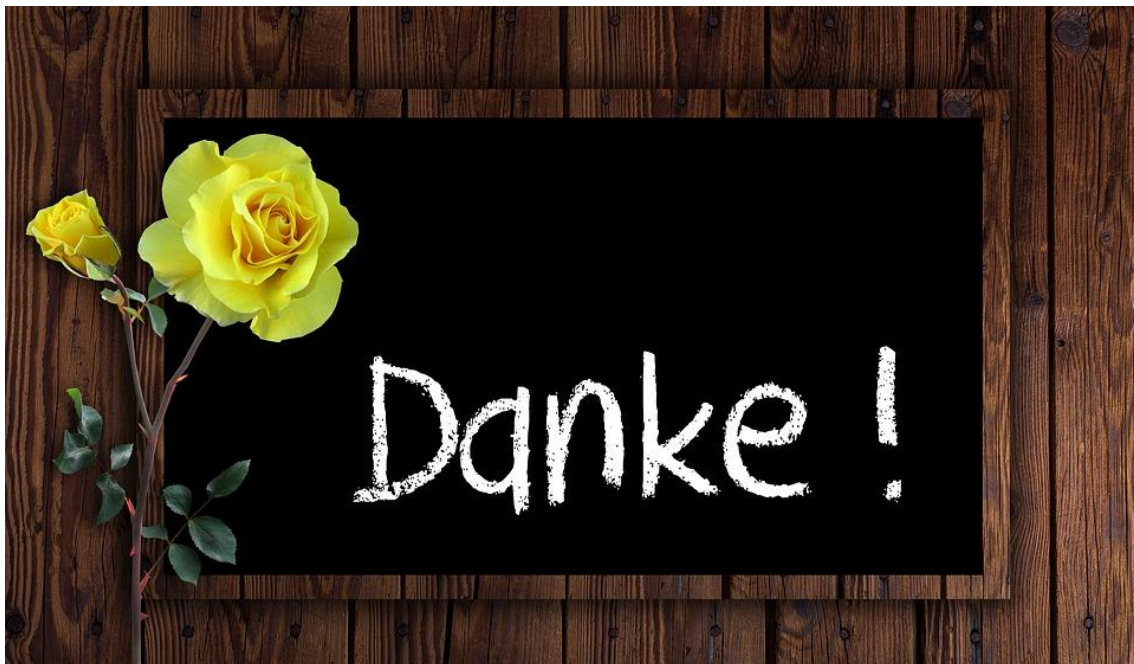

Foto: pixabay
